# Supplementary material
Source: Springer Nature journal article supplement (https://www.springermedizin.de/resource/supplementary/12970_2010_214_MOESM2_ESM.pdf/9594616)

Percentage of the athletes

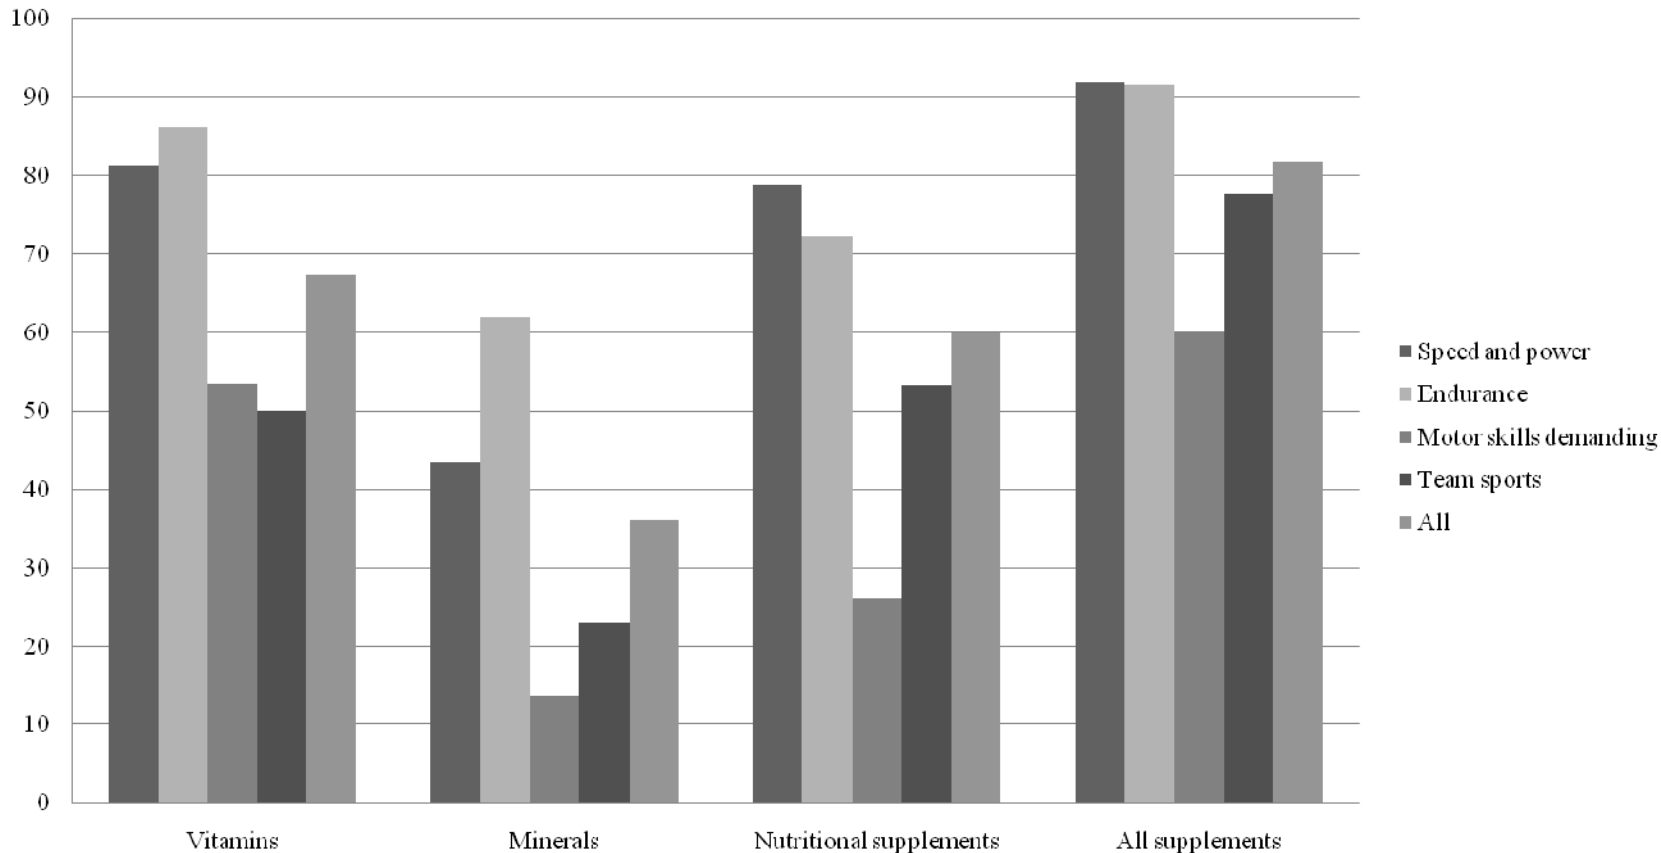

Supplement: MOESM2 [file 9594616]
